# Supplementary material for: Deriving and Using Descriptors of Elementary Functions in Rational Protein Design
Source: Frontiers journal article supplement (doi:10.3389/fbinf.2021.657529), 2021-04-13
Supplement: Image_4.PDF [file Image_4.PDF]

**Figure S4. Isotropic hydrogen bond distributions within 3.5Å per residue position where the residue acts as a donor, for DxDxD, GxGxxG, and GxxGxG signatures (in rows 1-3, respectively) of corresponding elementary functions. The first column (A) indicates the total number of bonds, the second (B) are for bonds where the other party is within the length-30 loop, and the third (C) are for bonds where the other party is outside of the loop.**

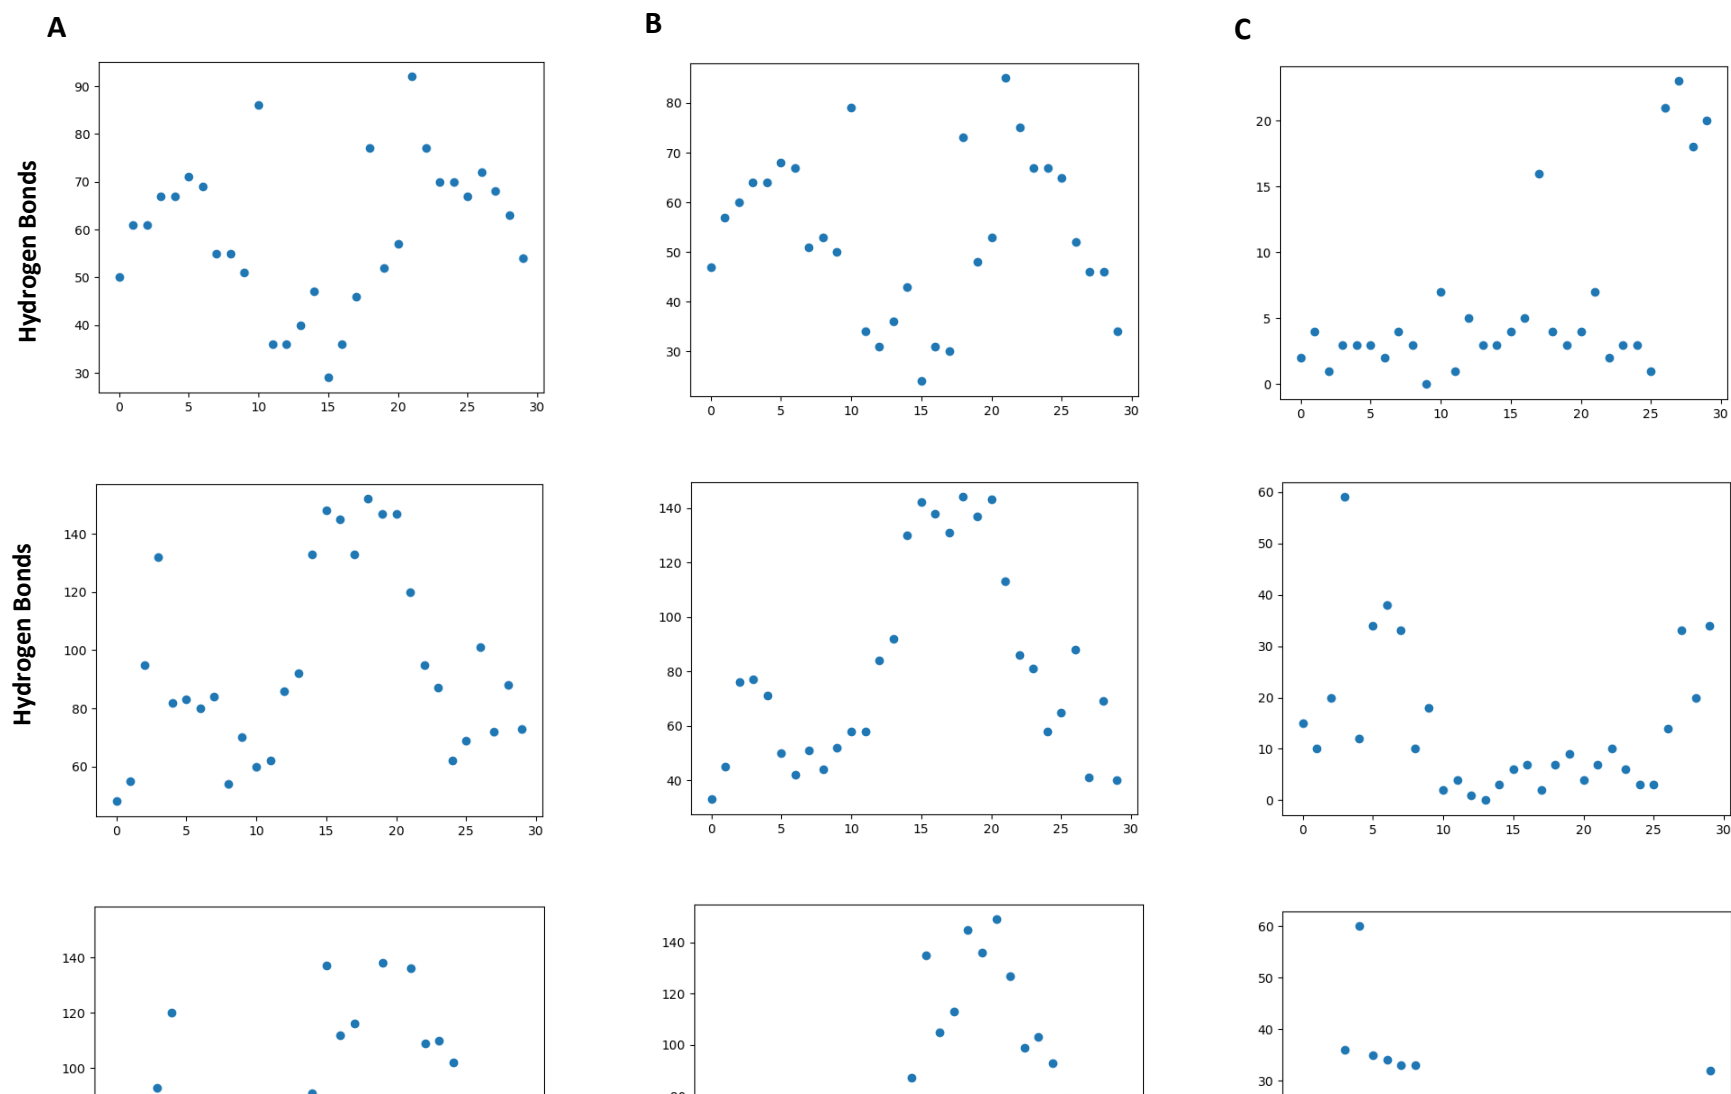

Hydrogen Bonds

Residue Position

Residue Position

Residue Position
